# Supplementary material for: In Vitro Efficacy of Dalbavancin as a Long-Acting Anti-Biofilm Agent Loaded in Bone Cement
Source: MDPI journal article supplement (doi:10.3390/antibiotics12091445), 2023-09-13
Supplement: s1 [file s1]

## Supplementary Materials

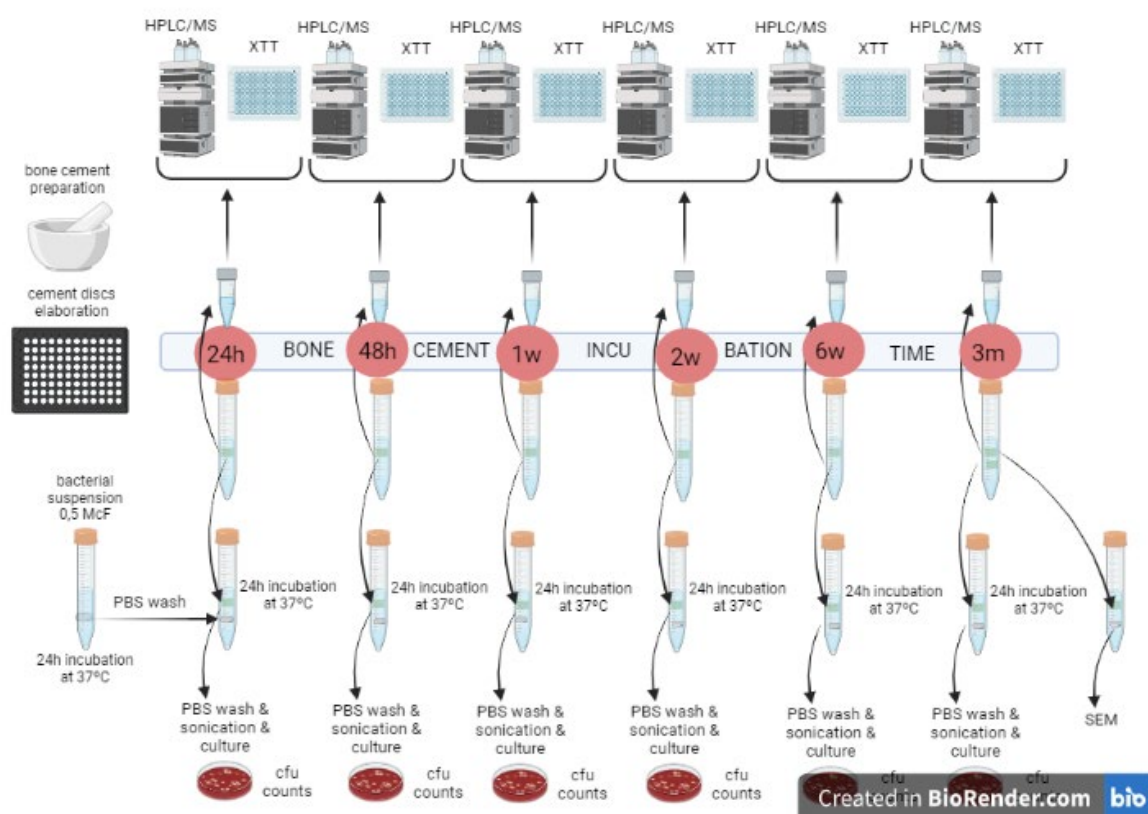

**Figure S1:** Laboratory procedure

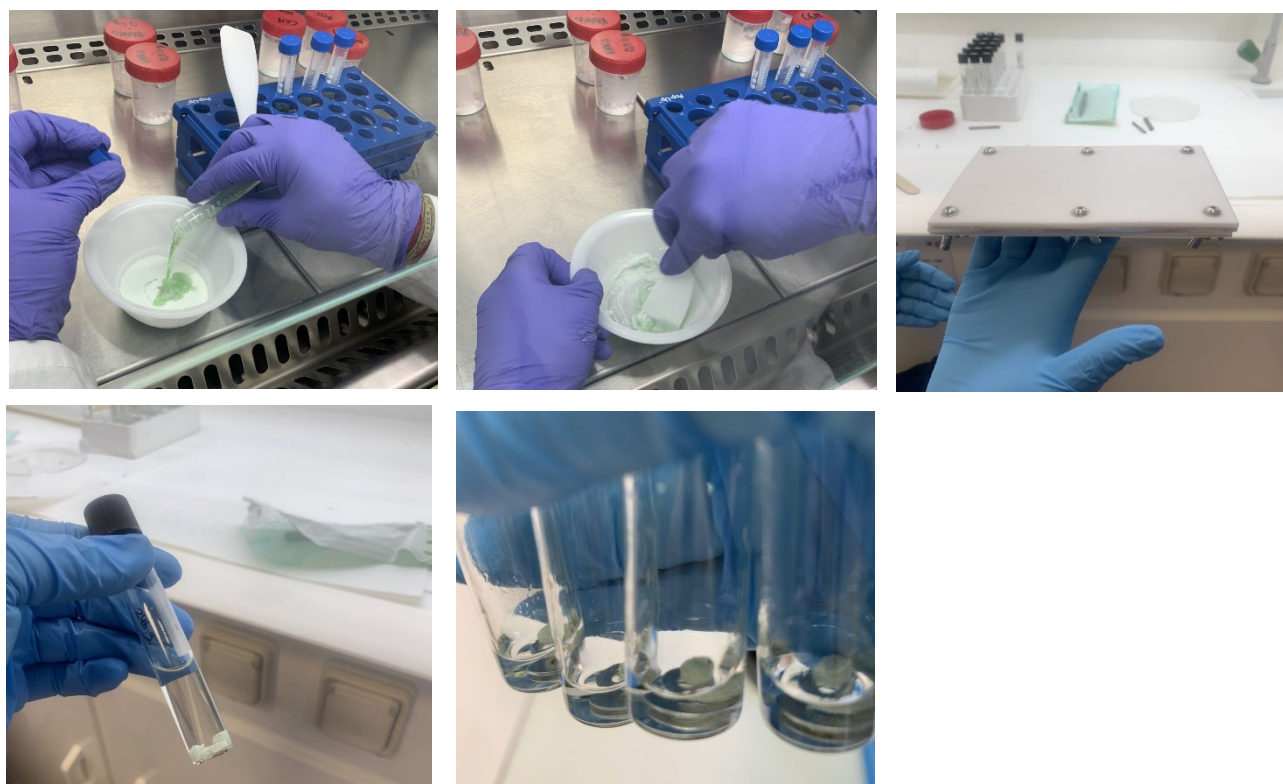

**Figure S2.** Elaboration of antibiotic loaded PMMA bone cement discs
